# Supplementary material for: Isolation and characterization of phosphofungi, and screening of their plant growth-promoting activities
Source: PubMed Central journal article supplement (PMC5910442; doi:10.1186/s13568-018-0593-4), 2018-04-20
Supplement: 13568_2018_593_MOESM1_ESM.pdf [file 13568_2018_593_MOESM1_ESM.pdf]

## **Additional file**

# **Isolation and characterization of phosphofungi and screening for plant growth-promoting activities**

## **AMB Express**

Xiaohui Wang<sup>1</sup>, Changdong Wang<sup>2</sup>, Junkang Sui<sup>1</sup>, Zhaoyang Liu<sup>2</sup>, Qian Li<sup>2</sup>, Chao Ji<sup>2</sup>, Xin Song<sup>2</sup>, Yurong Hu<sup>2</sup>, Changqian Wang<sup>2</sup>, Rongbo Sa<sup>1</sup>, Jiamiao Zhang<sup>2</sup>, Jianfeng Du<sup>2</sup>, Xunli Liu<sup>2\*</sup>

1 College of Life Science, Shandong Agriculture University, No. 61, Daizong Street, Taian, Shandong 271018, China

2 College of Forestry, Shandong Agricultural Universities, No. 61, Daizong Street, Taian, Shandong 271018, China

\* Author for correspondence, E-mail: [xunliliu@163.com](mailto:xunliliu@163.com)

Tel: 0086 0538 8249131

Fax: 0086 0538 8249164

Figure S1

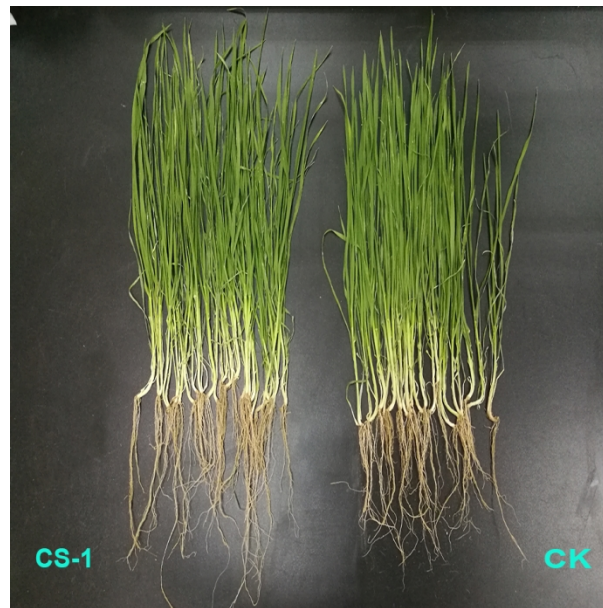

Fig.S1 Effect of the CS-1 strain on root length and shoot height of wheat seedlings. As compared with control, wheat seedlings treated with this strain had a greater number of tillers and lateral roots.

Table S1 Percent of pathogenic fungi abundance

| Treatment | Fusarium    | Gibberella  | Volutella   | Bipolaris   | Monographella |
|-----------|-------------|-------------|-------------|-------------|---------------|
| CK        | 5.83%±0.00a | 7.45%±0.01a | 0.73%±0.00a | 0.02%±0.00a | 1.13%±0.00a   |
| CS-1      | 2.15%±0.00b | 3.79%±0.01b | 0.10%±0.00a | 0.01%±0.00a | 0.50%±0.00a   |

Notes: Values are the means ± SD (n = 3). Means sharing a common letter within the same column are not significantly different at  $P < 0.05$ .
